# Supplementary material
Source: PubMed Central journal article supplement (PMC3252583)

Fig. 2A

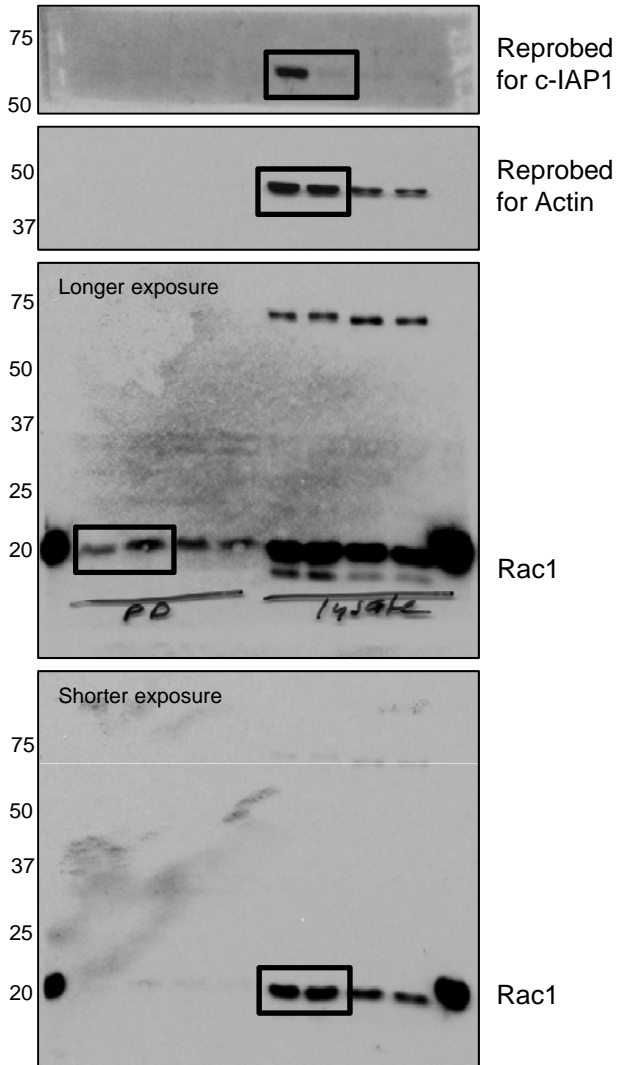

Fig. 2C

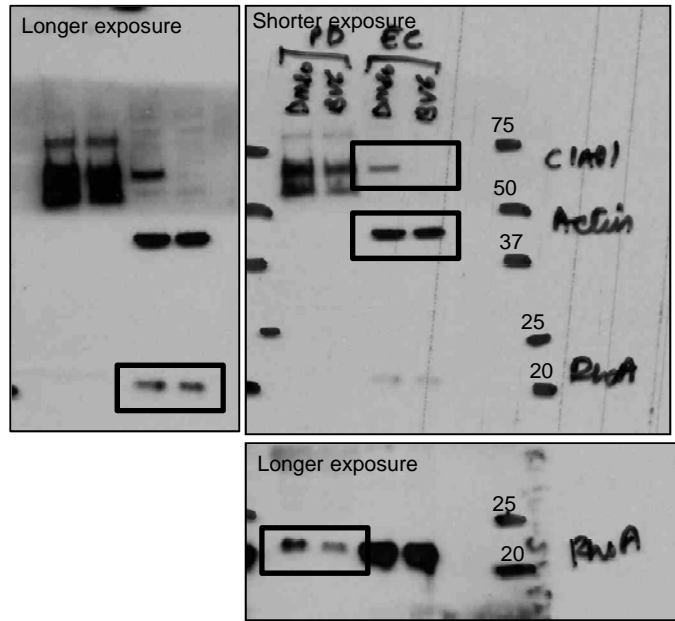

Fig. 2D

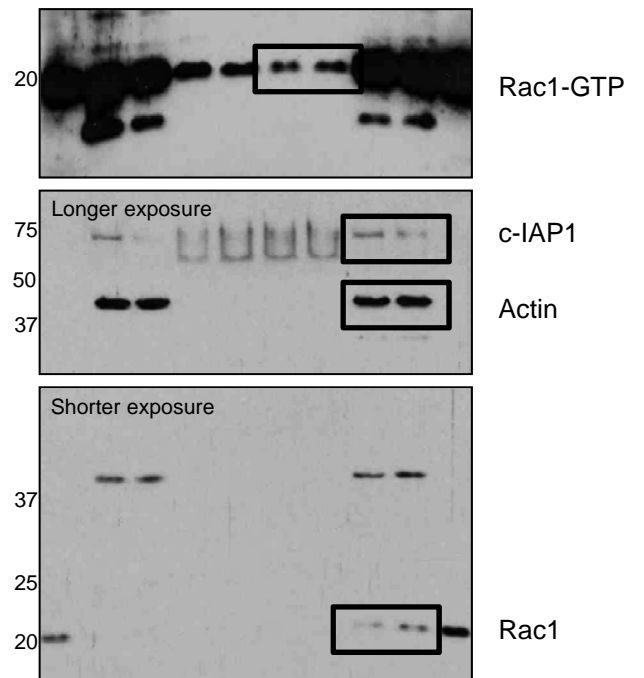

Fig. 2E

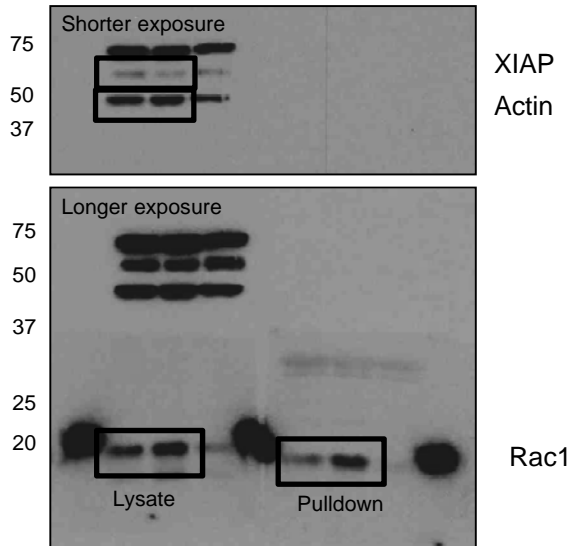

Fig. 2F

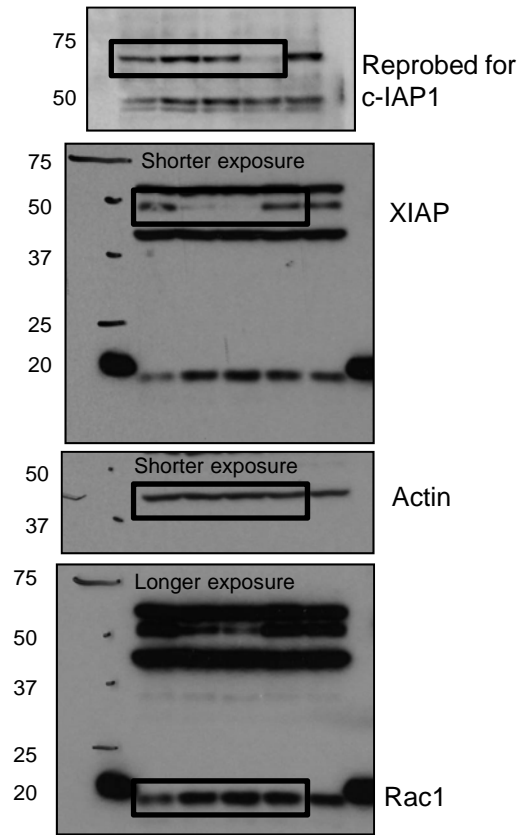

Fig. 2H

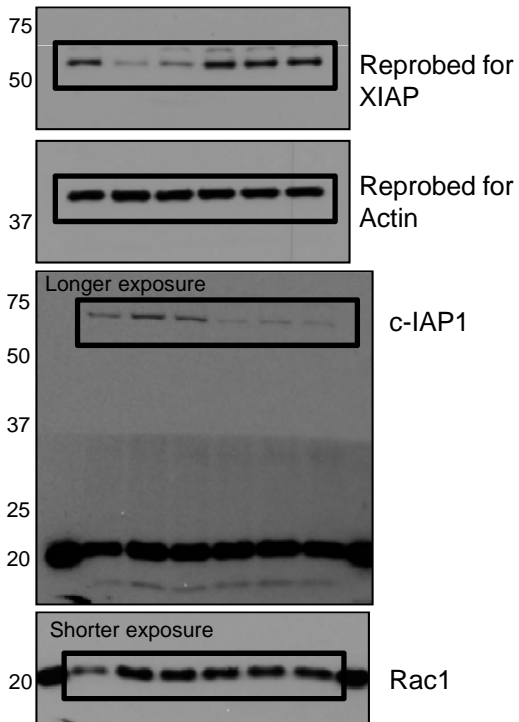

Fig. 2I

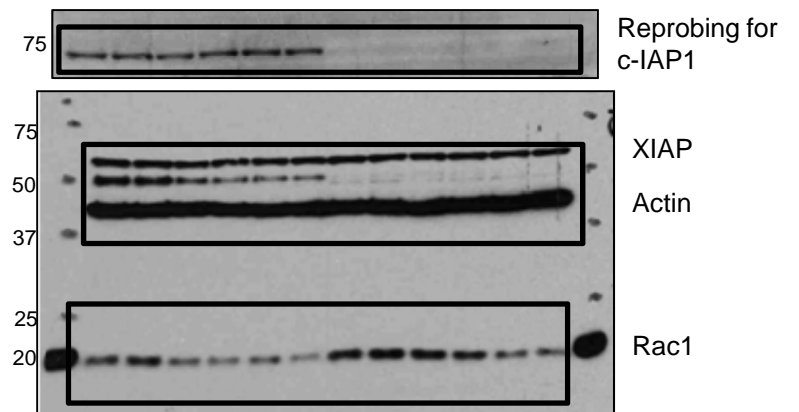

Fig. 4B

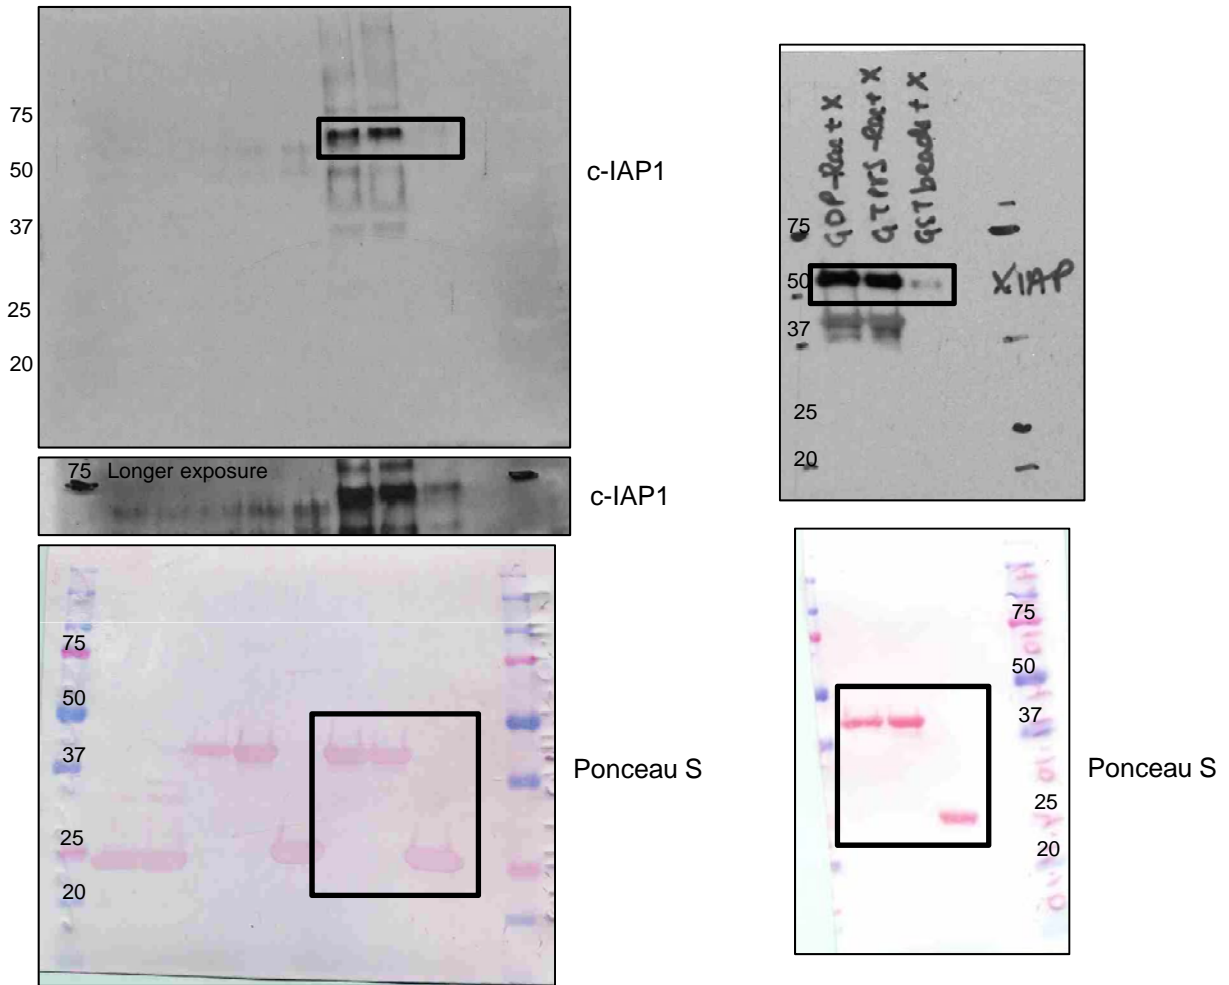

Fig. 5B

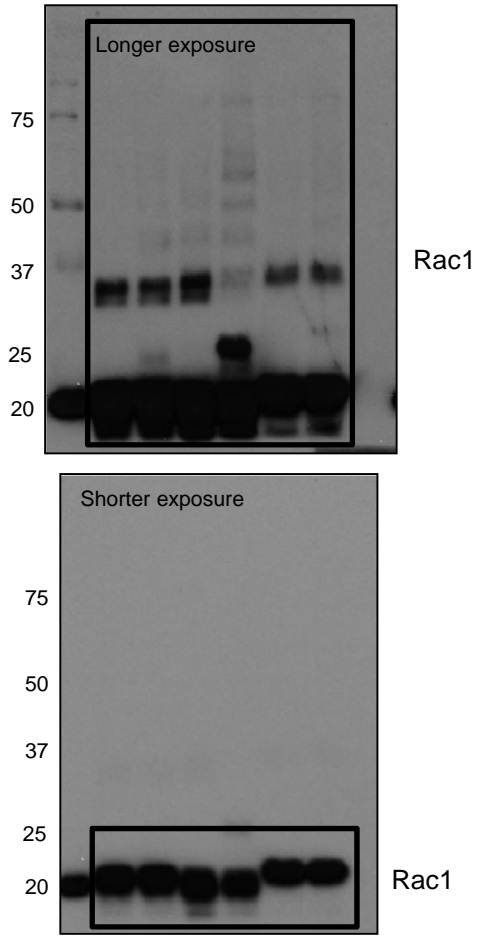

Fig. 5D

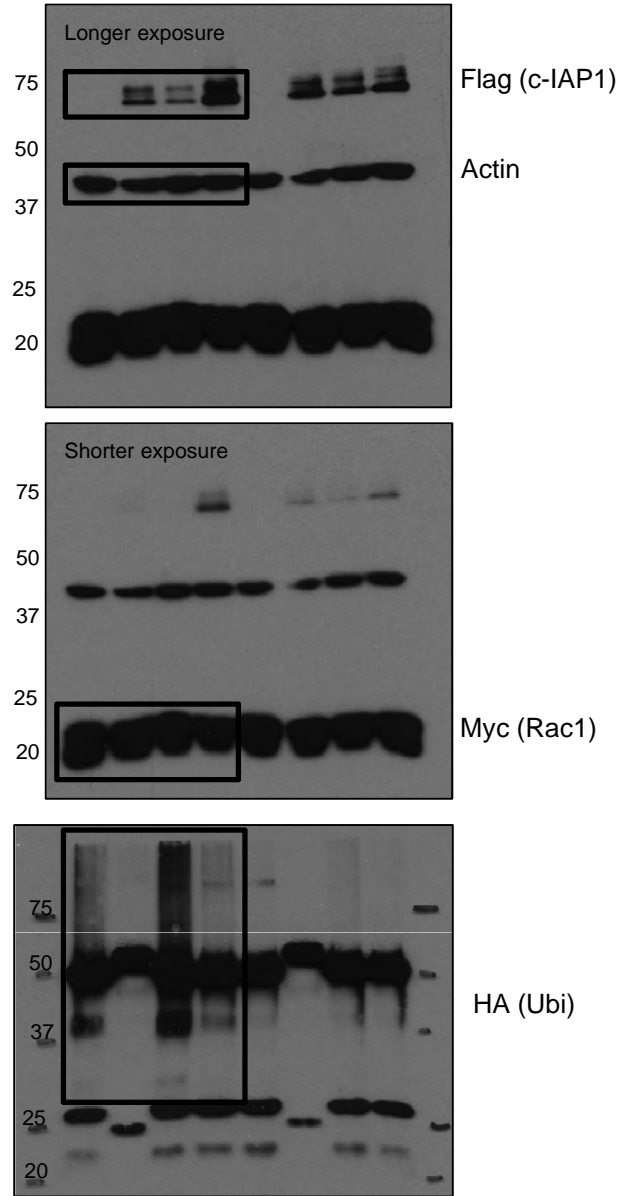

Fig. 5E

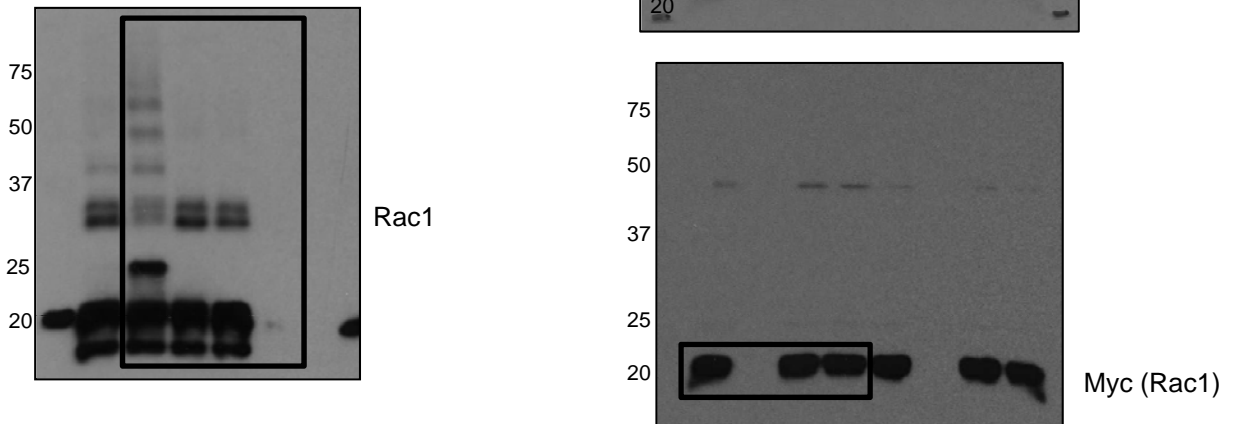

Fig. 6A

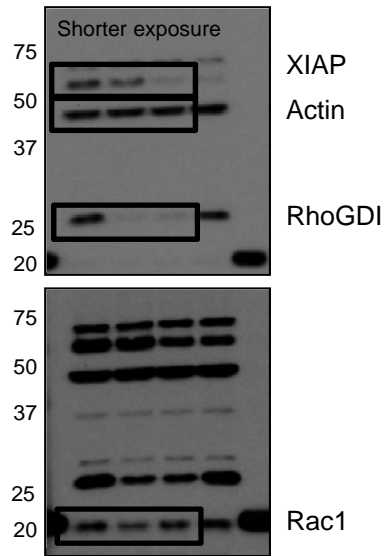

Fig. 6B

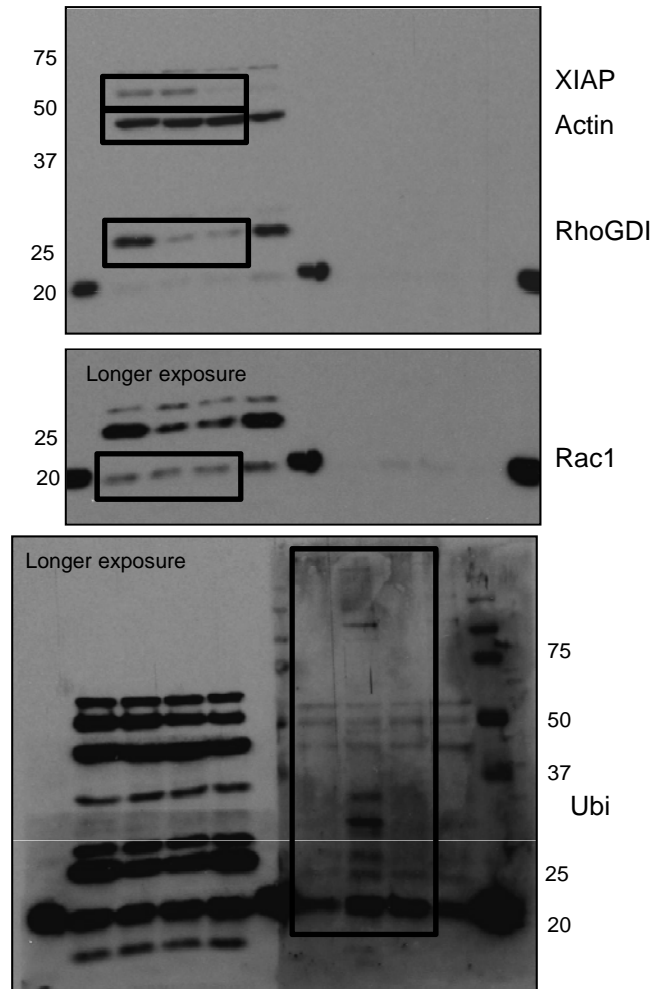

Fig. 6C

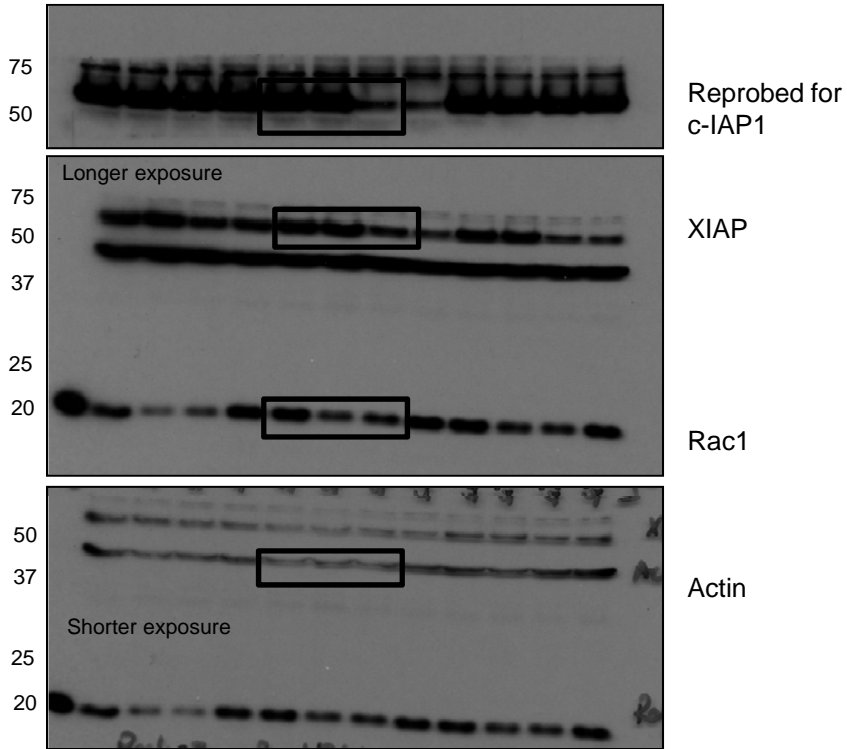

Fig. 6D

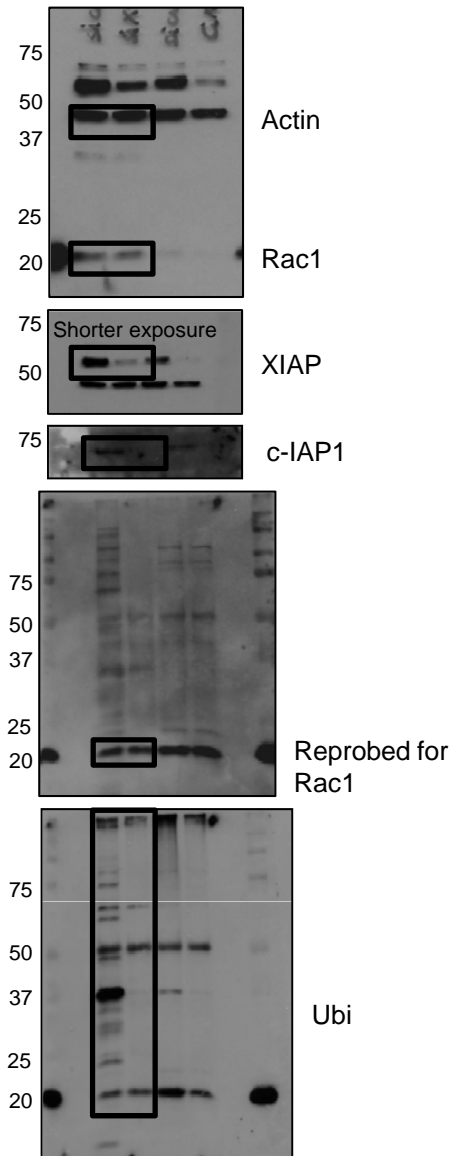

Fig. 7G

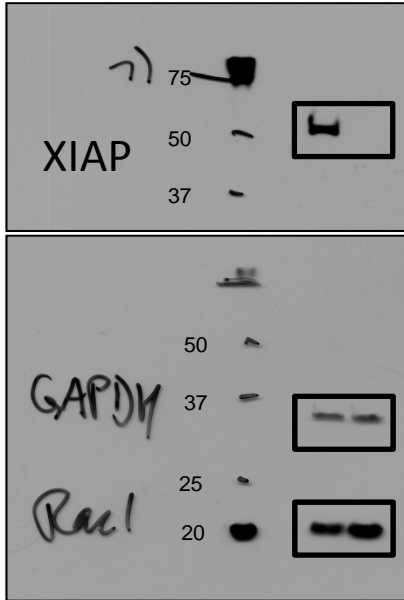

Fig. 7F

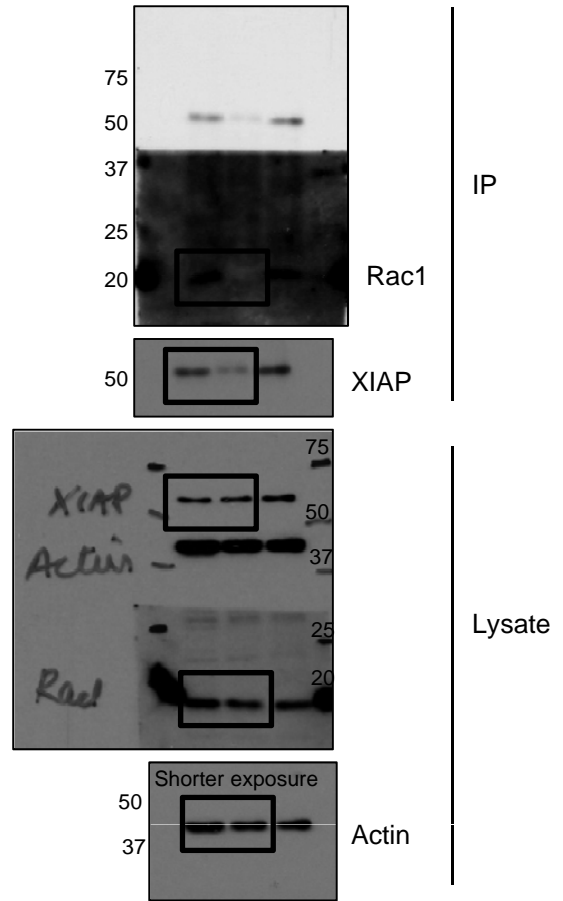

Fig. S2C

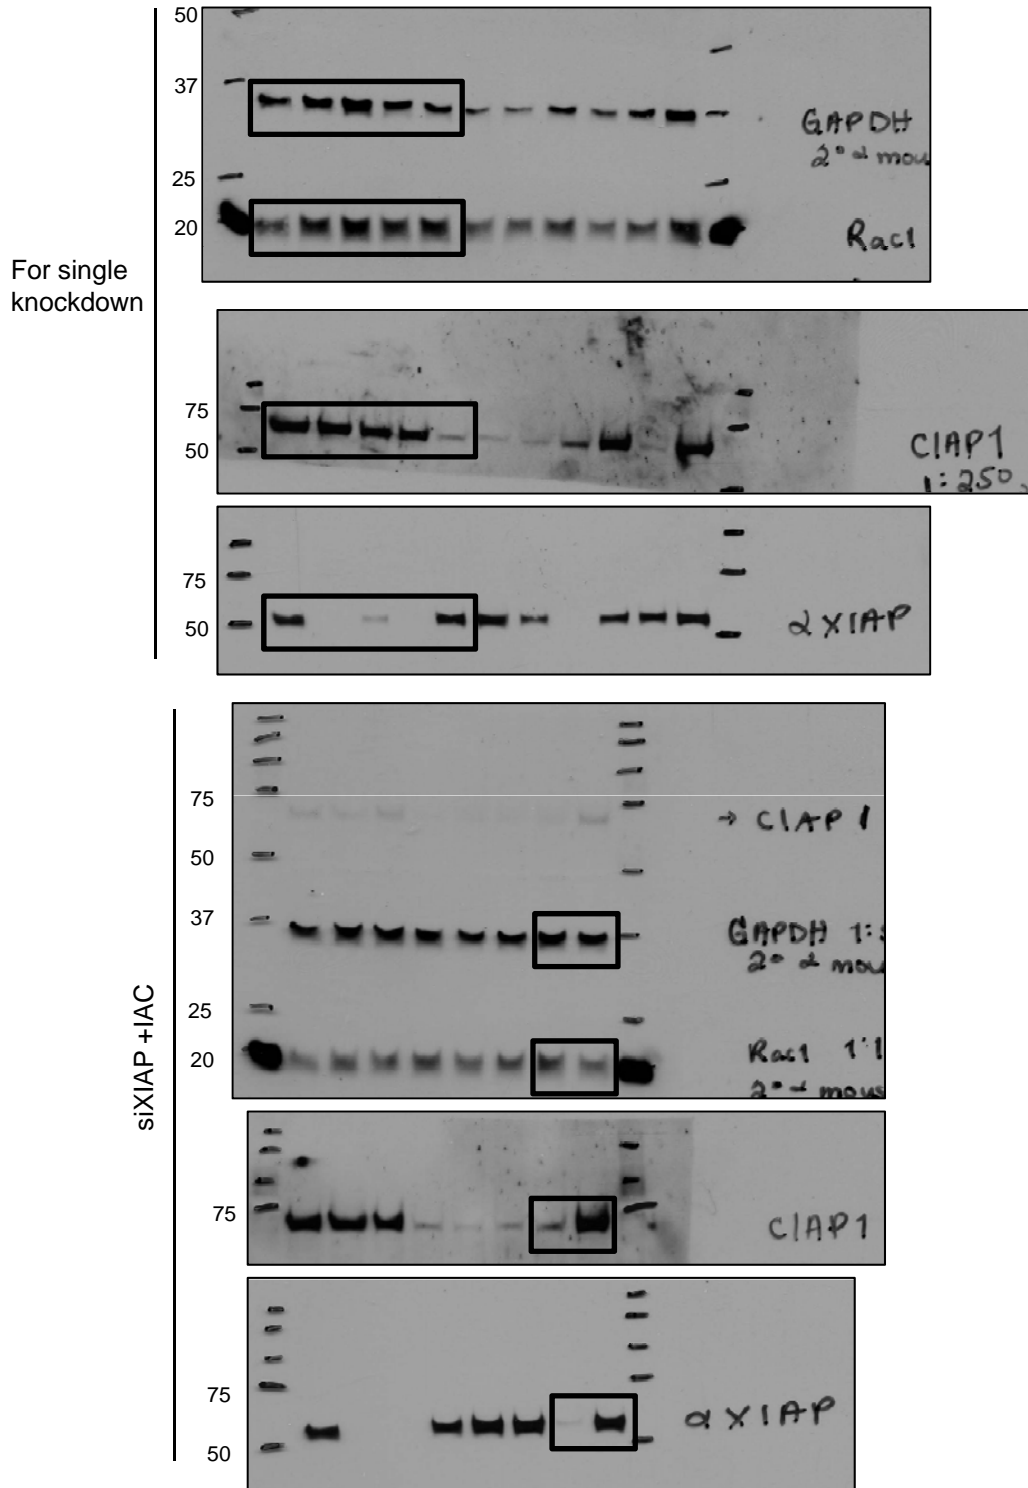



Fig. S2D

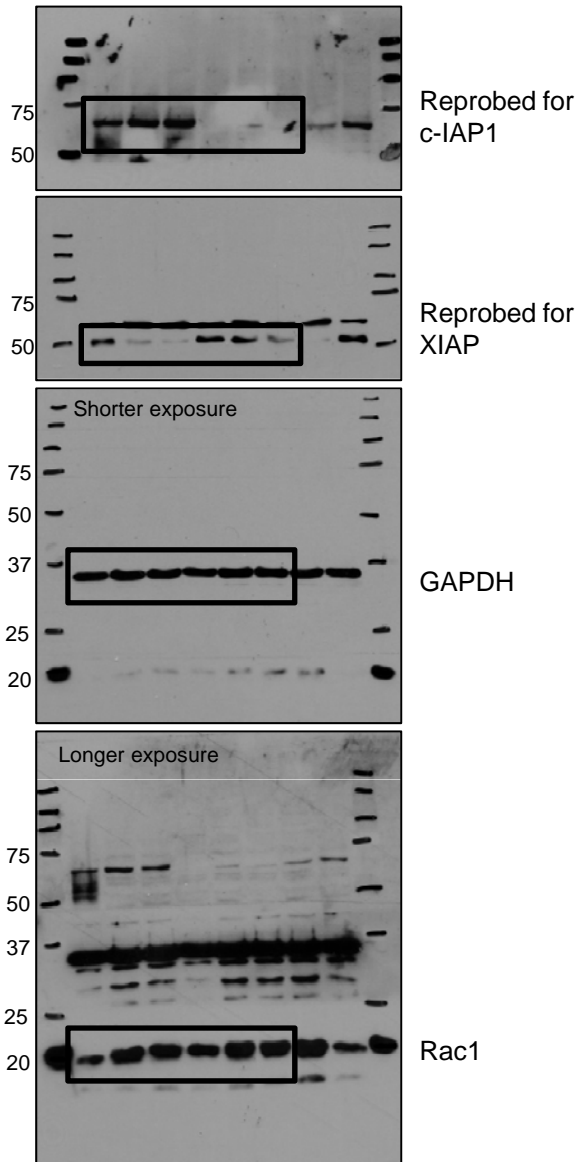

Fig. S2E

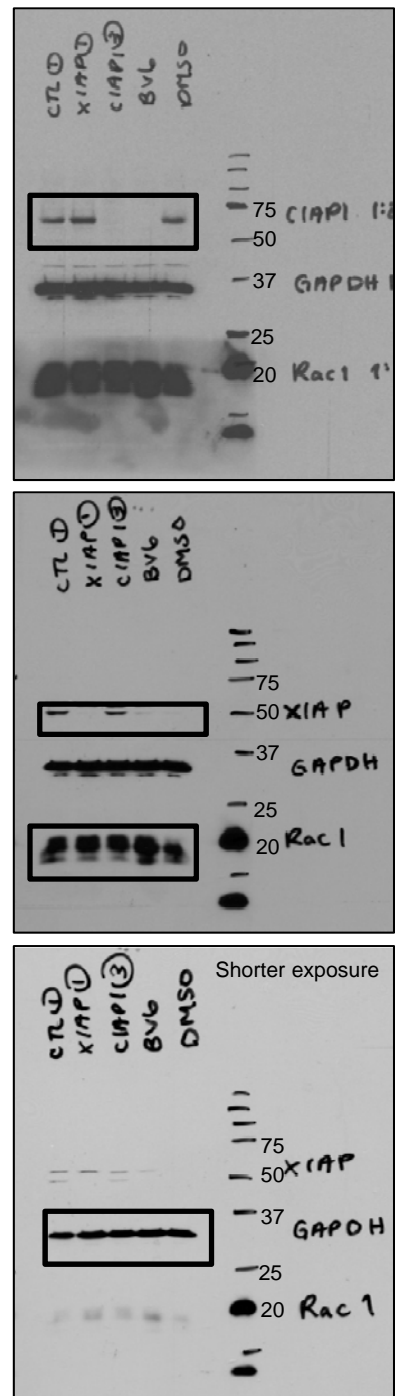

Fig. S6C

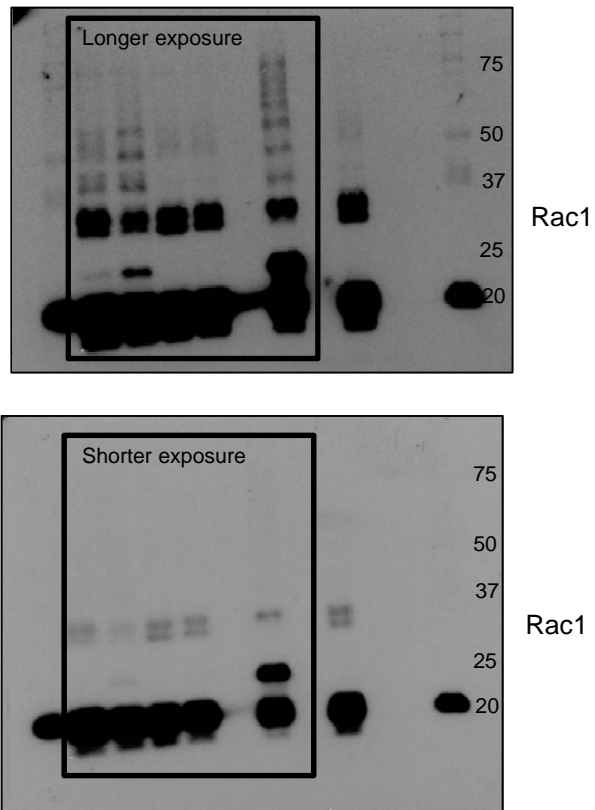

Supplement: emboj2011423s6.pdf [file emboj2011423s6.pdf]
